# Supplementary material for: CD8+ T cells specific for conserved, cross-reactive Gag epitopes with strong ability to suppress HIV-1 replication
Source: PubMed Central journal article supplement (PMC6029025; doi:10.1186/s12977-018-0429-y), 2018-07-03
Supplement: 12977_2018_429_MOESM1_ESM.pdf [file 12977_2018_429_MOESM1_ESM.pdf]

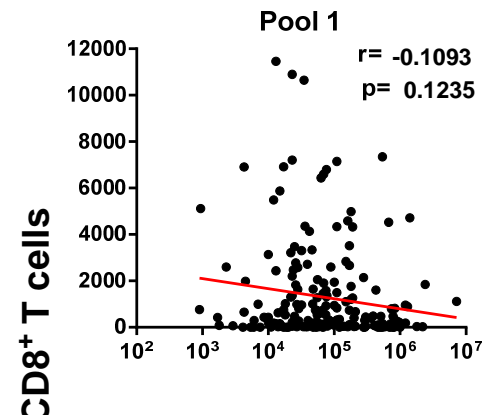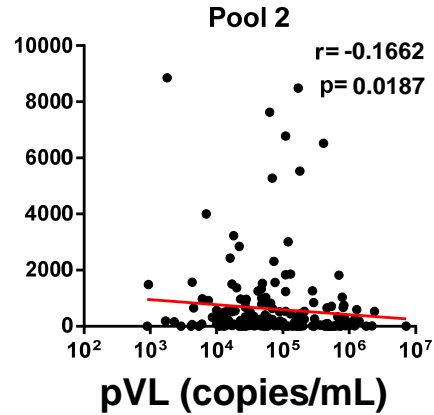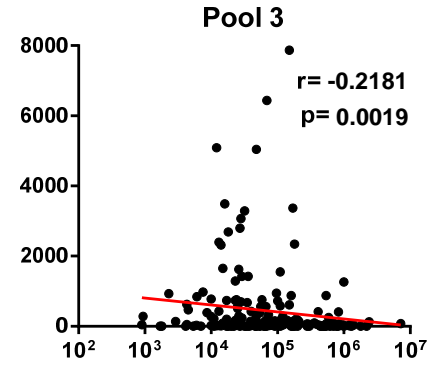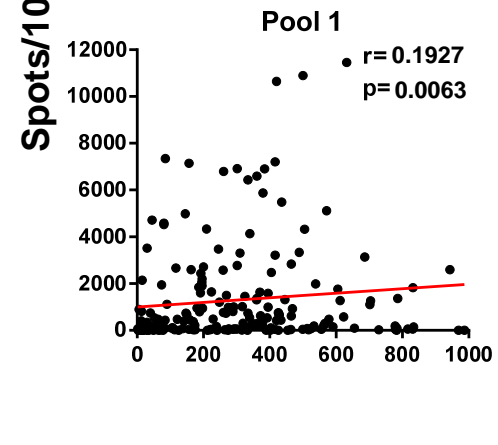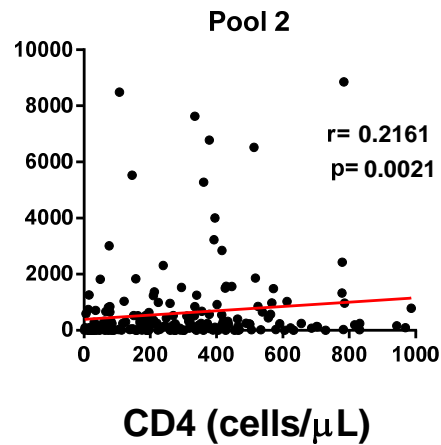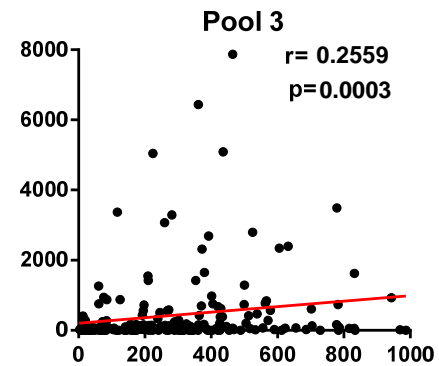

**N=200**
