# Supplementary material for: CD8+ T cells specific for conserved, cross-reactive Gag epitopes with strong ability to suppress HIV-1 replication
Source: PubMed Central journal article supplement (PMC6029025; doi:10.1186/s12977-018-0429-y), 2018-07-03
Supplement: 12977_2018_429_MOESM4_ESM.pdf [file 12977_2018_429_MOESM4_ESM.pdf]

### Gag TL8 (B\*40:02)

| ID      | Epitope sequence |
|---------|------------------|
| KI-989  | TERQANFL         |
| KI-1095 | TEKQANFL         |
| KI-1097 | TERQANFL         |
| KI-1248 | NERQANFL         |
| KI-1391 | NERQANFL         |

### Gag HR10 (A\*33:03)

| ID      | Epitope sequence |
|---------|------------------|
| KI-1002 | HIAKHCRAPR       |
| KI-1114 | HIAKHCRAPR       |
| KI-1235 | HIAKNCRAPR       |
| KI-1320 | HIAKNCRAPR       |
| KI-1330 | HIAKNCRAPR       |
