# Supplementary material for: CD8+ T cells specific for conserved, cross-reactive Gag epitopes with strong ability to suppress HIV-1 replication
Source: PubMed Central journal article supplement (PMC6029025; doi:10.1186/s12977-018-0429-y), 2018-07-03
Supplement: 12977_2018_429_MOESM6_ESM.pdf [file 12977_2018_429_MOESM6_ESM.pdf]

## Pool 1

|      |                   |
|------|-------------------|
| C001 | PIVQNLOQQMVHQAI   |
| C002 | PIVQNAQQQMVHQAL   |
| C003 | NLQGGQMVHQAI SPRT |
| C004 | NAQQQMVHQALS PRT  |
| C005 | QMVHQAI SPRTLNAW  |
| C006 | QMVHQALS PRTLNAW  |
| C007 | QAI SPRTLNAWVKVI  |
| C008 | QALS PRTLNAWVKVV  |
| C009 | PRTLNAWVKVIEEKA   |
| C010 | PRTLNAWVKVVEEKA   |
| C011 | NAWVKVIEEKAFSPE   |
| C012 | NAWVKVVEEKAFSPE   |
| C013 | KVIEEKAFSPEVIPM   |
| C014 | KVVEEKAFSPEVIPM   |
| C015 | EKAFSPEVIPMF TAL  |
| C016 | EKAFSPEVIPMF SAL  |
| C017 | SPEVIPMF TALSEGA  |
| C018 | SPEVIPMF SALSEGA  |
| C019 | IPMF TALSEGATPQD  |
| C020 | IPMF SALSEGATPQD  |
| C021 | TALSEGATPQDLNTM   |
| C022 | SALSEGATPQDLNMM   |
| C023 | EGATPQDLNTMLNTV   |
| C024 | EGATPQDLNMLNIV    |
| C025 | PQDLNTMLNTVGGHQ   |
| C026 | PQDLNMLNIVGGHQ    |
| C027 | NTMLNTVGGHQAA MQ  |
| C028 | NMMLNIVGGHQAA MQ  |
| C029 | NTVGGHQAA MQMLKD  |
| C030 | NIVGGHQAA MQMLKE  |
| C031 | GHQAA MQMLKDTINE  |
| C032 | GHQAA MQMLKETINE  |
| C033 | AMQMLKDTINEEAAE   |
| C034 | AMQMLKETINEEAAE   |
| C035 | LKDTINEEAAEWD RV  |
| C036 | LKETINEEAAEWD RL  |
| C037 | INEEAAEWD RVHPVH  |
| C038 | INEEAAEWD RLHPVH  |
| C039 | AAEWD RVHPVHAGPI  |
| C040 | AAEWD RLHPVHAGPI  |
| C041 | DRVHPVHAGPIAPGQ   |
| C042 | DRLHPVHAGPIPPGQ   |
| C043 | PVHAGPIAPGQ MREP  |
| C044 | PVHAGPIPPGQ MREP  |

## Pool 2

|      |                      |
|------|----------------------|
| C045 | GPIAPGQ MREPRGSD     |
| C046 | GPIPPGQ MREPRGSD     |
| C047 | PGQ MREPRGSDIAGT     |
| C048 | REPRGSDIAGTTSNL      |
| C049 | REPRGSDIAGTSTL       |
| C050 | GSDIAGTTSNLQE QI     |
| C051 | GSDIAGTTS TLQE QI    |
| C052 | AGTTSNLQE QIGWMT     |
| C053 | AGTSTLQE QIGWMT      |
| C054 | SNLQE QIGWMTSNPP     |
| C055 | STLQE QIGWMTNPP      |
| C056 | EQIGWMTSNPPIPVG      |
| C057 | EQIGWMTNPPIPVG       |
| C058 | WMTSNPPIPVGD IYK     |
| C059 | WMTNPPIPVGEIYK       |
| C060 | NPPIPVGD IYKRWII     |
| C061 | NPPIPVGEIYKRWII      |
| C062 | PVGD IYKRWIILGLN     |
| C063 | PVGEIYKRWIIMGLN      |
| C064 | IYKRWIILGLNK IVR     |
| C065 | IYKRWIIMGLNK IVR     |
| C066 | WIILGLNK IVRMYS P    |
| C067 | WIIMGLNK IVRMYS P    |
| C068 | GLNK IVRMYS PVSIL    |
| C069 | GLNK IVRMYS P SPTSIL |
| C070 | IVRMYS PVSILDIRQ     |
| C071 | IVRMYS P SPTSILDIKQ  |
| C072 | YSPVSILDIRQGPKE      |
| C073 | YSPTSILDIKQGPKE      |
| C074 | SILDIRQGPKEPFRD      |
| C075 | SILDIKQGPKEPFRD      |
| C076 | IRQGPKEPFRDYVDR      |
| C077 | IKQGPKEPFRDYVDR      |
| C078 | PKEPFRDYVDRFFKT      |
| C079 | PKEPFRDYVDRFYKT      |
| C080 | FRDYVDRFFKTLRAE      |
| C081 | FRDYVDRFYKTLRAE      |
| C082 | VDRFFKTLRAEQATQ      |
| C083 | VDRFYKTLRAEQASQ      |
| C084 | FKTLRAEQATQEVKN      |
| C085 | YKTLRAEQASQEVKN      |
| C086 | RAEQATQEVKNWMTD      |
| C087 | RAEQASQEVKNWMTD      |
| C088 | ATQEVKNWMTDTLLV      |
| C089 | ASQEVKNWMTETLLV      |
| C090 | VKNWMTDTLLVQ NAN     |
| C091 | VKNWMTETLLVQ NAN     |

## Pool 3

|      |                   |
|------|-------------------|
| C092 | MTDTLLVQ NANPDCK  |
| C093 | MTE TLLVQ NANPDCK |
| C094 | LLVQ NANPDCKTILR  |
| C095 | LLVQ NANPDCKTILK  |
| C096 | NANPDCKTILRALGP   |
| C097 | NANPDCKTILKALGP   |
| C098 | DCKTILRALGPGATL   |
| C099 | DCKTILKALGPAATL   |
| C100 | ILRALGPGATLEEMM   |
| C101 | ILKALGPAATLEEMM   |
| C102 | LPGGATLEEMMTACQ   |
| C103 | LGPAATLEEMMTACQ   |
| C104 | ATLEEMMTACQGVGG   |
| C105 | EMMTACQGVGGPGHK   |
| C106 | EMMTACQGVGGPSHK   |
| C107 | ACQGVGGPGHKARVL   |
| C108 | ACQGVGGPSHKARVL   |
| C109 | KCFNCGKEGHI AKNC  |
| C110 | KCFNCGKEGHLARNC   |
| C111 | CGKEGHI AKNCRAPR  |
| C112 | CGKEGHLARNCRAPR   |
| C113 | GHI AKNCRAPRKRGC  |
| C114 | GHLARNCRAPRKRGC   |
| C115 | KNCRAPRKRGCWKCG   |
| C116 | RNCRAPRKRGCWKCG   |
| C117 | APRKRGCWKCGREGH   |
| C118 | APRKRGCWKCGKEGH   |
| C119 | RGCWKCGREGHQMKD   |
| C120 | KGCWKCGKEGHQMKD   |
| C121 | KCGREGHQMKDCNER   |
| C122 | KCGKEGHQMKDCTER   |
| C123 | EGHQMKDCNERQANF   |
| C124 | EGHQMKDCTERQANF   |
| C125 | MKDCNERQANFLGKI   |
| C126 | MKDCTERQANFLGKI   |
| C127 | NERQANFLGKIWPSH   |
| C128 | TERQANFLGKIWPSN   |
| C129 | ANFLGKIWPSHKGRP   |
| C130 | ANFLGKIWPSNKG RP  |
| C131 | GKIWPSHKGRPGNFL   |
| C132 | GKIWPSNKG RPNFP   |
| C133 | PSHKGRPGNFLQSRP   |
| C134 | PSNKG RPNFPQSRP   |
| C135 | GRPGNFLQSRPEPTA   |
| C136 | GRPNFPQSRPEPSA    |
| C137 | NFLQSRPEPTAPP     |
| C138 | NFPQSRPEPSAPP     |

Blue : Mosaic 1  
Red : Mosaic 2
